# Supplementary material for: Impact of Oral Hygiene Discontinuation on Supragingival and Salivary Microbiomes
Source: PubMed Central journal article supplement — JDR Clin Trans Res. 2017 Jul 31;3(1):57–64. doi: 10.1177/2380084417723625 (PMC5896869; doi:10.1177/2380084417723625), 2017-07-31
Supplement: DS_10.1177_2380084417723625.pdf [file DS_10.1177_2380084417723625.pdf]

## Impact of Oral Hygiene Discontinuation on Supragingival and Salivary Microbiomes

D. Belstrøm, M.L. Sembler-Møller, M.A. Grande, N. Kirkby, S.L. Cotton, B.J. Paster, S. Twetman,  
and P. Holmstrup

### Appendix

**Appendix Table 1. Background and oral characteristics of the cohort**

---

|                          |                |
|--------------------------|----------------|
| <b>Gender (M/F)*</b>     | 5/24 (17%/83%) |
| <b>Age**</b>             | 24.7 (22-29)   |
| <b>Number of teeth**</b> | 27.8 (24-28)   |
| <b>DMFT**</b>            | 1.7 (0-7)      |
| <b>DT**</b>              | 0.0 (0-0)      |
| <b>DMFS**</b>            | 2.4 (0-12)     |
| <b>DS**</b>              | 0.0 (0-0)      |

DMFT: Decayed-missed-filled-teeth

DT: Decayed-teeth

DMFS: Decayed-missed-filled-surfaces

DS: Decayed-surfaces

\*: Gender expressed as number and percentage of the cohort

\*\* : Parameters expressed as mean and range

**Appendix Table 2. Species level abundance of supragingival microbiota.** Mean relative abundance of bacterial species in pooled supragingival sample, which were influenced by oral hygiene discontinuation. Relative abundance in baseline samples (n=29) was compared to relative abundance in samples collected at day 4 (n=29), day 7 (n=29) and day 10 (n=29) after discontinuation of oral hygiene and 14 days (n=29) after reuptake of oral hygiene. \*: relative abundance significantly different from baseline levels (adjusted p-value <0.01).

| Species name                      | Baseline | Day 4    | Day 7        | Day 10       | Day 24       |
|-----------------------------------|----------|----------|--------------|--------------|--------------|
| <i>Abiotrophia_defectiva</i>      | 0.1245%  | 0.1901%  | 0.3412%<br>* | 0.4763%<br>* | 0.3219%<br>* |
| <i>Actinobaculum_sp_HOT_183</i>   | 0.0516%  | 0.0823%  | 0.1543%<br>* | 0.1208%      | 0.1965%<br>* |
| <i>Actinomyces_graevenitzii</i>   | 0.0187%  | 0.0021%  | 0.0001%<br>* | 0.0004%<br>* | 0.0004%<br>* |
| <i>Actinomyces_johnsonii</i>      | 0.0060%  | 0.0242%* | 0.0101%      | 0.0345%<br>* | 0.0680%<br>* |
| <i>Actinomyces_lingnae</i>        | 0.0400%  | 0.0104%  | 0.0035%<br>* | 0.0050%<br>* | 0.0019%<br>* |
| <i>Actinomyces_massiliensis</i>   | 0.0300%  | 0.1060%* | 0.0449%      | 0.0586%      | 0.0744%<br>* |
| <i>Actinomyces_naeslundii</i>     | 0.0223%  | 0.0028%* | 0.0020%<br>* | 0.0160%      | 0.0010%<br>* |
| <i>Actinomyces_sp_HOT_170</i>     | 0.0104%  | 0.0324%* | 0.0066%      | 0.0396%<br>* | 0.0333%<br>* |
| <i>Actinomyces_sp_HOT_171</i>     | 0.0143%  | 0.0342%  | 0.0138%      | 0.0518%<br>* | 0.0305%      |
| <i>Actinomyces_sp_HOT_172</i>     | 0.0143%  | 0.0342%  | 0.0138%      | 0.0518%<br>* | 0.0305%      |
| <i>Alloprevotella_sp_HOT_308</i>  | 0.0113%  | 0.0017%* | 0.0008%<br>* | 0.0014%<br>* | 0.0009%<br>* |
| <i>Alloprevotella_sp_HOT_914</i>  | 0.1887%  | 0.0989%  | 0.0505%<br>* | 0.0511%<br>* | 0.0623%<br>* |
| <i>Atopobium_parvulum</i>         | 0.0109%  | 0.0012%* | 0.0001%<br>* | 0.0002%<br>* | 0.0002%<br>* |
| <i>Atopobium_rimae</i>            | 0.0052%  | 0.0108%* | 0.0010%<br>* | 0.0045%      | 0.0036%      |
| <i>Butyrivibrio_sp_HOT_455</i>    | 0.0082%  | 0.0063%  | 0.0002%<br>* | 0.0000%<br>* | 0.0001%<br>* |
| <i>Campylobacter_gracilis</i>     | 0.2688%  | 0.4099%* | 0.4535%<br>* | 0.4146%<br>* | 0.5479%<br>* |
| <i>Capnocytophaga_leadbetteri</i> | 0.2460%  | 0.7850%* | 0.7656%<br>* | 0.5916%<br>* | 0.3886%      |

|                                        |         |          |              |              |              |
|----------------------------------------|---------|----------|--------------|--------------|--------------|
| <i>Capnocytophaga_sputigena</i>        | 0.1839% | 0.6556%* | 0.8539%<br>* | 0.7152%<br>* | 0.3751%      |
| <i>Cardiobacterium_hominis</i>         | 0.1944% | 0.5966%* | 0.3613%      | 0.6466%<br>* | 0.4523%      |
| <i>Cardiobacterium_valvarum</i>        | 0.0753% | 0.1914%  | 0.2271%<br>* | 0.3107%<br>* | 0.1801%      |
| <i>Catonella_morbi</i>                 | 0.0879% | 0.0228%  | 0.0008%<br>* | 0.0010%<br>* | 0.0010%<br>* |
| <i>Centipeda_periodontii</i>           | 0.0119% | 0.0435%* | 0.0535%<br>* | 0.0611%<br>* | 0.0537%<br>* |
| <i>Corynebacterium_matruchotii</i>     | 2.4006% | 3.9712%  | 4.6308%<br>* | 4.5963%<br>* | 5.9270%<br>* |
| <i>Eikenella_corrodens</i>             | 0.0730% | 0.2121%* | 0.1800%<br>* | 0.2239%<br>* | 0.1767%<br>* |
| <i>Filifactor_alocis</i>               | 0.0011% | 0.0001%* | 0.0021%      | 0.0000%<br>* | 0.0016%      |
| <i>Fusobacterium_periodonticum</i>     | 1.9247% | 0.9288%* | 0.6225%<br>* | 0.5221%<br>* | 0.3708%<br>* |
| <i>Fusobacterium_sp_HOT_205</i>        | 0.0050% | 0.0089%  | 0.0105%<br>* | 0.0109%<br>* | 0.0072%      |
| <i>Gemella_haemolysans</i>             | 0.7513% | 0.3571%  | 0.1567%<br>* | 0.1797%<br>* | 0.1844%<br>* |
| <i>Gemella_morbillosum</i>             | 0.1236% | 0.8410%* | 0.3678%      | 0.9225%<br>* | 0.4638%      |
| <i>Gemella_sanguinis</i>               | 0.5813% | 0.1239%  | 0.0102%<br>* | 0.0078%<br>* | 0.0138%<br>* |
| <i>Granulicatella_adiacens</i>         | 1.0356% | 0.3945%* | 0.3466%<br>* | 0.2933%<br>* | 0.5662%      |
| <i>Haemophilus_parainfluenzae</i>      | 3.3378% | 2.0639%* | 1.5277%<br>* | 1.0401%<br>* | 1.5851%<br>* |
| <i>Haemophilus_pittmaniae</i>          | 0.2362% | 0.0679%  | 0.0039%<br>* | 0.0118%<br>* | 0.0131%<br>* |
| <i>Lachnospiraceae[G-2]_sp_HOT_088</i> | 0.0048% | 0.0162%  | 0.0327%<br>* | 0.0353%<br>* | 0.0281%<br>* |
| <i>Lachnospiraceae[G-3]_sp_HOT_100</i> | 0.0005% | 0.0016%  | 0.0039%<br>* | 0.0044%<br>* | 0.0029%<br>* |
| <i>Lachnospiraceae[G-8]_sp_HOT_500</i> | 0.0029% | 0.0031%  | 0.0014%      | 0.0001%<br>* | 0.0029%      |
| <i>Leptotrichia_goodfellowii</i>       | 0.0231% | 0.0897%* | 0.0611%      | 0.0469%      | 0.0965%<br>* |
| <i>Leptotrichia_hongkongensis</i>      | 1.4553% | 2.7461%* | 3.3706%<br>* | 2.8815%<br>* | 4.0651%<br>* |
| <i>Leptotrichia_shahii</i>             | 0.2877% | 0.7174%* | 1.6828%<br>* | 0.7520%<br>* | 1.7520%<br>* |
| <i>Leptotrichia_sp_HOT_212</i>         | 0.4368% | 2.0767%* | 2.2239%<br>* | 2.2951%<br>* | 1.0500%      |
| <i>Leptotrichia_sp_HOT_215</i>         | 0.3664% | 0.5921%* | 0.5370%<br>* | 0.3926%      | 0.1794%      |

|                                                          |         |          |         |         |         |
|----------------------------------------------------------|---------|----------|---------|---------|---------|
| <i>Leptotrichia_sp_HOT_223</i>                           | 0.1624% | 0.1005%  | 0.1544% | 0.2972% | 0.2823% |
|                                                          |         |          |         | *       | *       |
| <i>Leptotrichia_sp_HOT_392</i>                           | 0.1996% | 0.7335%* | 1.1502% | 0.8745% | 0.7566% |
|                                                          |         |          | *       | *       | *       |
| <i>Megasphaera_micronuciformis</i>                       | 0.0692% | 0.0292%  | 0.0075% | 0.0047% | 0.0095% |
|                                                          |         |          | *       | *       | *       |
| <i>Neisseria_flavescens</i>                              | 2.3918% | 0.9649%* | 0.2091% | 0.2003% | 0.0707% |
|                                                          |         |          | *       | *       | *       |
| <i>Oribacterium_asaccharolyticum</i>                     | 0.0259% | 0.0086%* | 0.0018% | 0.0014% | 0.0017% |
|                                                          |         |          | *       | *       | *       |
| <i>Oribacterium_parvum</i>                               | 0.0724% | 0.0111%  | 0.0002% | 0.0007% | 0.0001% |
| <i>Oribacterium_sinus</i>                                | 0.1742% | 0.0374%  | 0.0057% | 0.0035% | 0.0065% |
|                                                          |         |          | *       | *       | *       |
| <i>Peptostreptococcaceae[XI][G-1][Eubacterium]_sulci</i> | 0.0411% | 0.0082%  | 0.0015% | 0.0052% | 0.0010% |
|                                                          |         |          | *       | *       | *       |
| <i>Peptostreptococcaceae[XI][G-2]_sp_HOT_091</i>         | 0.0021% | 0.0016%  | 0.0000% | 0.0000% | 0.0000% |
|                                                          |         |          | *       | *       | *       |
| <i>Peptostreptococcus_stomatis</i>                       | 0.0831% | 0.0285%  | 0.0251% | 0.0120% | 0.0189% |
|                                                          |         |          |         | *       | *       |
| <i>Prevotella_melaninogenica</i>                         | 5.0461% | 1.4787%* | 0.7389% | 0.8553% | 0.9571% |
|                                                          |         |          | *       | *       | *       |
| <i>Prevotella_nanceiensis</i>                            | 0.7485% | 0.2441%  | 0.0605% | 0.0200% | 0.0223% |
|                                                          |         |          | *       | *       | *       |
| <i>Prevotella_pallens</i>                                | 0.2749% | 0.2474%  | 0.0367% | 0.2019% | 0.0246% |
|                                                          |         |          | *       |         | *       |
| <i>Prevotella_scopos</i>                                 | 0.2344% | 0.0251%  | 0.0001% | 0.0005% | 0.0002% |
|                                                          |         |          | *       | *       | *       |
| <i>Prevotella_shahii</i>                                 | 0.0394% | 0.0085%  | 0.0002% | 0.0003% | 0.0001% |
|                                                          |         |          | *       | *       | *       |
| <i>Prevotella_sp_HOT_305</i>                             | 0.0033% | 0.0038%  | 0.0002% | 0.0002% | 0.0000% |
|                                                          |         |          | *       | *       | *       |
| <i>Prevotella_sp_HOT_396</i>                             | 0.0046% | 0.0021%  | 0.0007% | 0.0032% | 0.0002% |
|                                                          |         |          | *       |         | *       |
| <i>Prevotella_sp_HOT_472</i>                             | 0.0903% | 0.3418%* | 0.2770% | 0.2895% | 0.3087% |
|                                                          |         |          | *       | *       | *       |
| <i>Prevotella_veroralis</i>                              | 0.0431% | 0.0595%  | 0.0068% | 0.0030% | 0.0074% |
|                                                          |         |          | *       | *       | *       |
| <i>Propionibacterium_propionicum</i>                     | 0.0000% | 0.0007%  | 0.0003% | 0.0013% | 0.0244% |
|                                                          |         |          |         |         | *       |
| <i>Propionibacterium_sp_HOT_194</i>                      | 0.0001% | 0.0003%  | 0.0003% | 0.0004% | 0.0082% |
|                                                          |         |          |         |         | *       |
| <i>Rothia_dentocariosa</i>                               | 2.2201% | 0.5157%* | 0.3046% | 0.3484% | 0.5322% |
|                                                          |         |          | *       | *       | *       |
| <i>Rothia_mucilaginoso</i>                               | 2.9438% | 0.5958%* | 0.0189% | 0.0216% | 0.0392% |
|                                                          |         |          | *       | *       | *       |
| <i>Selenomonas_dianae</i>                                | 0.0140% | 0.0262%  | 0.0319% | 0.0491% | 0.0334% |
|                                                          |         |          |         | *       |         |

|                                  |         |          |              |              |              |
|----------------------------------|---------|----------|--------------|--------------|--------------|
| <i>Selenomonas_flueggei</i>      | 0.0016% | 0.0273%* | 0.0380%<br>* | 0.0301%<br>* | 0.0163%<br>* |
| <i>Selenomonas_sp_HOT_137</i>    | 0.0008% | 0.0007%  | 0.0017%<br>* | 0.0008%      | 0.0018%<br>* |
| <i>Stomatobaculum_sp_HOT_097</i> | 0.0911% | 0.0348%  | 0.0074%      | 0.0179%<br>* | 0.0066%      |
| <i>Tannerella_sp_HOT_286</i>     | 0.2752% | 0.7475%* | 0.6919%<br>* | 0.8474%<br>* | 0.7057%<br>* |
| <i>TM7[G-1]_sp_HOT_352</i>       | 0.1115% | 0.0514%  | 0.0074%<br>* | 0.0133%      | 0.0041%<br>* |
| <i>TM7[G-1]_sp_HOT_952</i>       | 0.0276% | 0.2077%* | 0.2556%<br>* | 0.2450%<br>* | 0.3219%<br>* |
| <i>Treponema_denticola</i>       | 0.0013% | 0.0003%* | 0.0018%      | 0.0000%<br>* | 0.0107%<br>* |
| <i>Veillonella_atypica</i>       | 0.2874% | 0.0862%  | 0.0175%<br>* | 0.0074%<br>* | 0.0200%<br>* |
| <i>Veillonella_denticariosi</i>  | 0.0578% | 0.0060%* | 0.0022%<br>* | 0.0001%<br>* | 0.0011%<br>* |
| <i>Veillonella_rogosae</i>       | 0.4170% | 0.0854%* | 0.0103%<br>* | 0.0083%<br>* | 0.0120%<br>* |

**Appendix Table 3. Species level abundance of salivary microbiota.** Mean relative abundance of bacterial species in saliva samples, which were influenced by oral hygiene discontinuation. Relative abundance in baseline samples (n=29) was compared to relative abundance in samples collected at day 4 (n=29), day 7 (n=29) and day 10 (n=29) after discontinuation of oral hygiene and 14 days (n=29) after reuptake of oral hygiene. \*: relative abundance significantly different from baseline levels (adjusted p-value <0.01).

| Species name                         | Baseline | Day 4  | Day 7  | Day 10 | Day 24 |
|--------------------------------------|----------|--------|--------|--------|--------|
| <i>Atopobium_parvulum</i>            | 0.06%    | 0.03%  | 0.01%* | 0.05%  | 0.07%  |
| <i>Bacteroidetes[G-5]_sp_HOT_507</i> | 0.00%    | 0.00%  | 0.00%  | 0.39%* | 0.11%* |
| <i>Capnocytophaga_gingivalis</i>     | 0.01%    | 0.06%* | 0.07%* | 0.06%* | 0.01%  |
| <i>Capnocytophaga_granulosa</i>      | 0.00%    | 0.03%  | 0.07%* | 0.04%  | 0.01%  |
| <i>Capnocytophaga_leadbetteri</i>    | 0.02%    | 0.09%* | 0.15%* | 0.08%  | 0.03%  |
| <i>Capnocytophaga_sputigena</i>      | 0.02%    | 0.19%* | 0.13%* | 0.17%* | 0.02%  |
| <i>Cardiobacterium_hominis</i>       | 0.04%    | 0.14%* | 0.30%* | 0.13%* | 0.03%  |
| <i>Cardiobacterium_valvarum</i>      | 0.01%    | 0.03%  | 0.16%* | 0.06%  | 0.01%  |
| <i>Eikenella_corrodens</i>           | 0.02%    | 0.08%* | 0.08%* | 0.05%  | 0.02%  |
| <i>Kingella_oralis</i>               | 0.03%    | 0.13%  | 0.64%* | 0.12%  | 0.03%  |
| <i>Leptotrichia_sp_HOT_212</i>       | 0.07%    | 0.17%  | 0.72%* | 0.38%* | 0.13%  |
| <i>Rothia_mucilaginosa</i>           | 6.54%    | 4.52%  | 2.43%* | 4.66%  | 5.14%  |
